# Supplementary material for: Metabolomics-based analysis in Daphnia magna after exposure to low environmental concentrations of polystyrene nanoparticles
Source: Royal Society of Chemistry journal article supplement (doi:10.1039/d3en00142c), 2023-01-01
Supplement: d3en00142c1.pdf [file d3en00142c1.pdf]

## Supplementary Information

### Metabolomics-based analysis in *Daphnia magna* after exposure to low environmental concentrations of polystyrene nanoparticles

Egle Kelpsiene<sup>a,b</sup>, Tommy Cedervall<sup>a,b\*</sup>, and Anders Malmendal<sup>c</sup>

<sup>a</sup> Department of Biochemistry and Structural Biology, Lund University, P.O. Box

124, SE-221 00 Lund, Sweden

<sup>b</sup> NanoLund, Lund University, P.O. Box 118, SE-221 00, Lund, Sweden

<sup>c</sup> Department of Science and Environment, Roskilde University, P.O. Box 260

DK-4000 Roskilde, Denmark

\*Corresponding author:

[tommy.cedervall@biochemistry.lu.se](mailto:tommy.cedervall@biochemistry.lu.se)

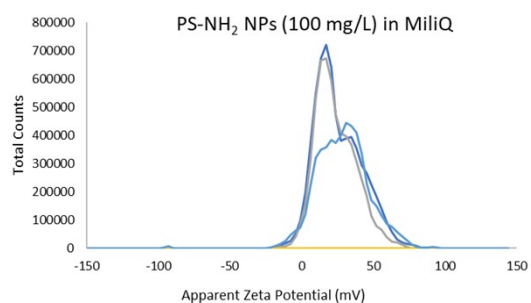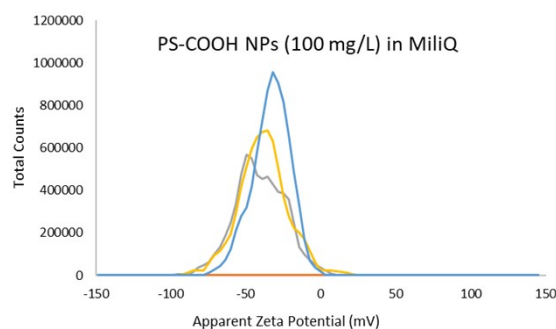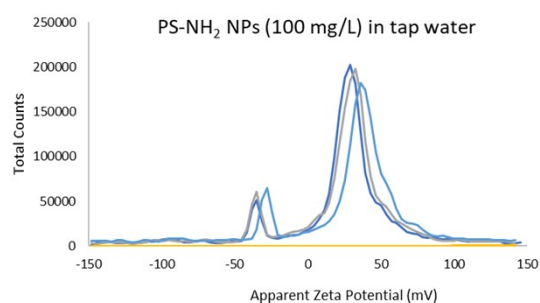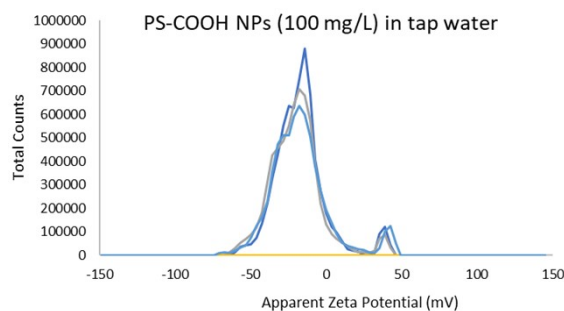

**Supplementary Fig. 1.** Zeta potential measurements for PS NPs used in the study. PS NPs were measured either in MiliQ water or in tap water at concentrations of 100 mg/L,

**Table S1. MANOVA comparisons of effect of presence, concentration, and type of nanoparticles.** P values for comparisons of scores from principal component analysis (PCA) to test effect of presence, concentration, and type of NPs at different daphnid ages using MANOVA. Conc = effect of concentration for all NPs, Conc NH<sub>2</sub> = effect of concentration for PS-NH<sub>2</sub> NPs, Conc COOH = effect of concentration for PS-COOH NPs, Nanotype = effect of nanoparticle type, Nano = effect of nanoparticles, Nano 3.2 µg/L = effect of nanoparticles at 3.2 µg/L, Nano 32 µg/L = effect of nanoparticles at 32 µg/L, Nano 320 µg/L = effect of nanoparticles at 320 µg/L.

| Age (days)           | 2                    | 9                    | 16                   | 23                   | 30                   | 37                   | median               |
|----------------------|----------------------|----------------------|----------------------|----------------------|----------------------|----------------------|----------------------|
| Conc                 | $3.2 \times 10^{-2}$ | $2.6 \times 10^{-2}$ | $8.2 \times 10^{-1}$ | $2.8 \times 10^{-1}$ | $6.6 \times 10^{-1}$ | $5.8 \times 10^{-3}$ | $1.6 \times 10^{-1}$ |
| Conc NH <sub>2</sub> | $8.8 \times 10^{-2}$ | $1.5 \times 10^{-2}$ | $1.7 \times 10^{-1}$ | $2.0 \times 10^{-4}$ | $3.8 \times 10^{-5}$ | $2.5 \times 10^{-1}$ | $5.2 \times 10^{-2}$ |
| Conc COOH            | $4.0 \times 10^{-1}$ | $2.1 \times 10^{-3}$ | $1.4 \times 10^{-5}$ | $3.1 \times 10^{-2}$ | $1.0 \times 10^{-1}$ | $6.0 \times 10^{-7}$ | $1.6 \times 10^{-2}$ |
| Nanotype             | $1.4 \times 10^{-3}$ | $2.6 \times 10^{-1}$ | $4.4 \times 10^{-1}$ | $1.7 \times 10^{-1}$ | $4.9 \times 10^{-4}$ | $1.5 \times 10^{-1}$ | $1.6 \times 10^{-1}$ |
| Nano                 | $1.1 \times 10^{-8}$ | $2.1 \times 10^{-4}$ | $6.8 \times 10^{-3}$ | $3.6 \times 10^{-6}$ | $5.3 \times 10^{-8}$ | $1.3 \times 10^{-7}$ | $1.9 \times 10^{-6}$ |
| Nano 3.2 µg/L        | $6.5 \times 10^{-9}$ | $1.3 \times 10^{-2}$ | $1.2 \times 10^{-1}$ | $7.3 \times 10^{-4}$ | $2.1 \times 10^{-5}$ | $1.1 \times 10^{-7}$ | $3.8 \times 10^{-4}$ |
| Nano 32 µg/L         | $3.7 \times 10^{-5}$ | $2.3 \times 10^{-5}$ | $9.0 \times 10^{-3}$ | $3.8 \times 10^{-6}$ | $4.8 \times 10^{-2}$ | $7.2 \times 10^{-3}$ | $3.6 \times 10^{-3}$ |
| Nano 320 µg/L        | $5.5 \times 10^{-2}$ | $1.6 \times 10^{-9}$ | $4.7 \times 10^{-7}$ | $1.1 \times 10^{-5}$ | $6.2 \times 10^{-7}$ | $6.4 \times 10^{-9}$ | $5.5 \times 10^{-7}$ |
